# Supplementary material
Source: publisher site journal article supplement (http://www.apsnet.org/meetings/mtngwshops/NPDRS/Documents/2006/Appendix8.pdf)
Supplement: Supplementary file 1 [file Appendix8.pdf]

# Analytic Hierarchy Process for Prioritization of Exotic Plant Pests and Pathogens

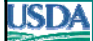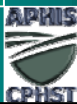

Kimberly Schwartzburg  
USDA APHIS PPQ  
Center for Plant Health Science and Technology

APS/USDA NPDRS Workshop  
April 13-14, 2006  
Memphis, TN

## Early Detection

- High cost of introduced plant pests
- Benefits of early detection

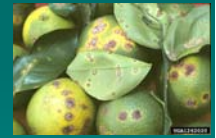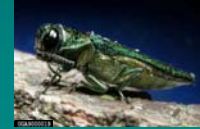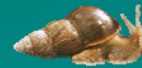

## Cooperative Agricultural Pest Survey (CAPS)

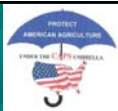

- USDA APHIS and State Departments of Agriculture
- Early detection of exotic plant pests
  - ◆ Arthropods
  - ◆ Weeds
  - ◆ Pathogens
  - ◆ Mollusks

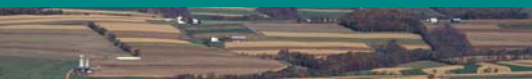

## Identifying High Priority Pests

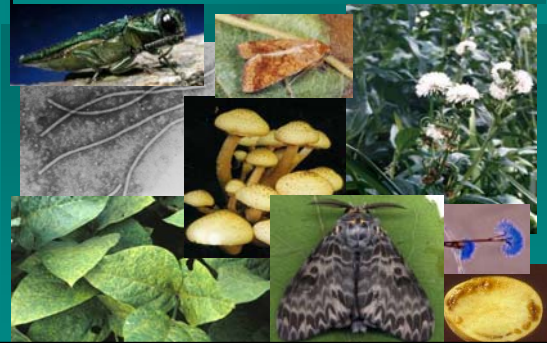

## Prioritization Method Needs

- Dynamic
- Incorporate subjective and objective data
- Scientifically defensible
- Transparent
- Adaptable process to meet changing needs

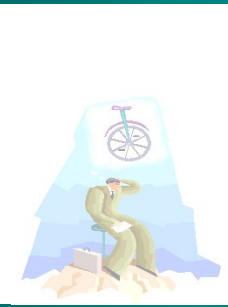

## Analytic Hierarchy Process

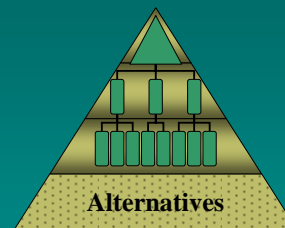

## Pest Universe (139 pests)

Focus: Exotic or limited distribution

- Professional Society Pest Lists
- APHIS Pest Lists
- NAFC Exotic Forest Pest Database

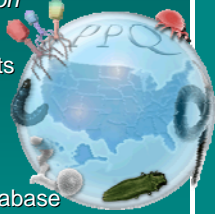

## Criteria Development

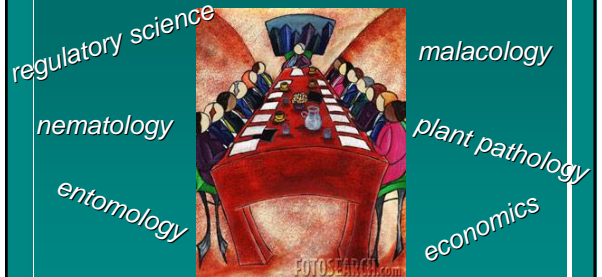

## Criteria Hierarchy

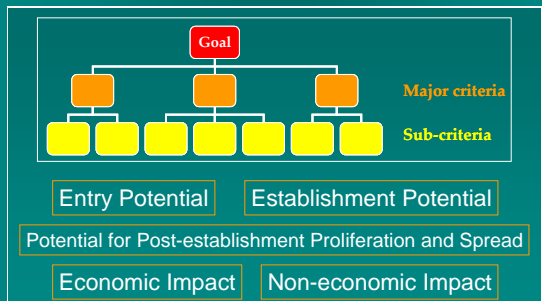

## Priorities of Major Criteria

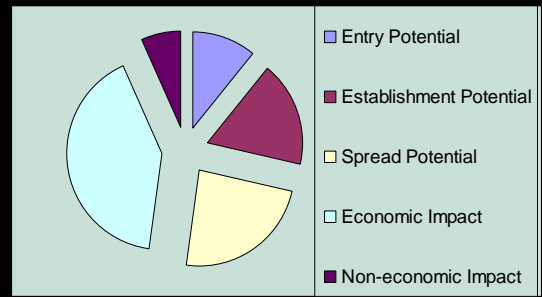

## Pest Evaluations

- Questionnaire
- 32 subject matter experts

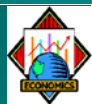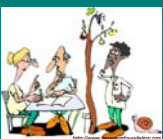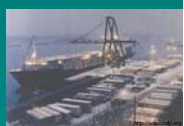

## Pest Evaluations

The pest's reproductive potential is:

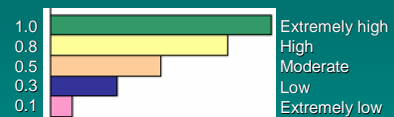

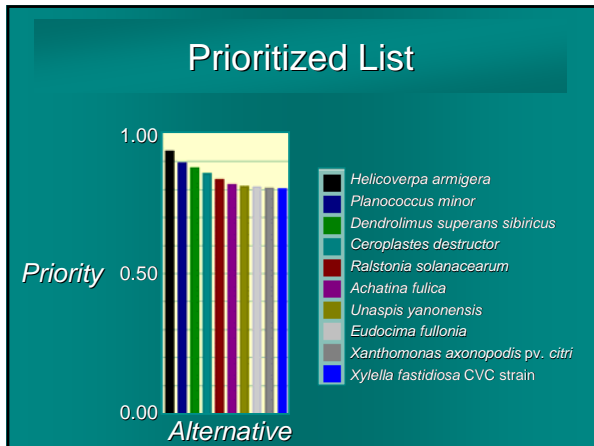

### View for the Future

- CAPS Program
  - ◆ Subgroup for pest prioritization
  - ◆ Peer review of pest evaluations
  - ◆ Online access
- Other Programs/Projects

### CPHST Pest Prioritization Team

Woody Bailey      Laura Duffié  
 Dan Fieselmann
